# Supplementary figures and images for: The Last Universal Common Ancestor: emergence, constitution and genetic legacy of an elusive forerunner
Source: Springer Nature journal article supplement (doi:10.1186/1745-6150-3-29), 2008-07-09

**Metabolism**

**dihydroxyacetone  
phosphate**

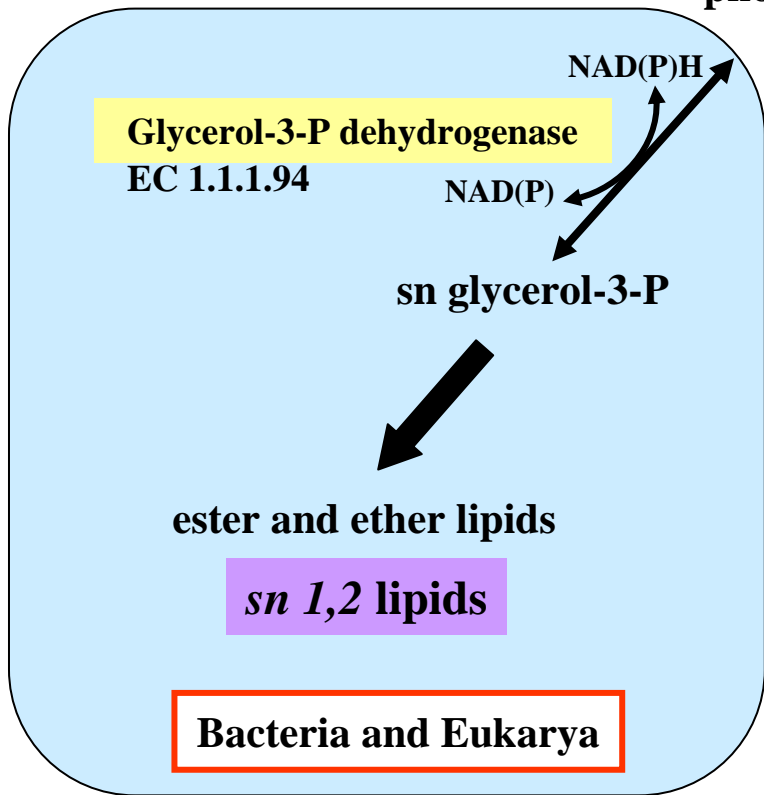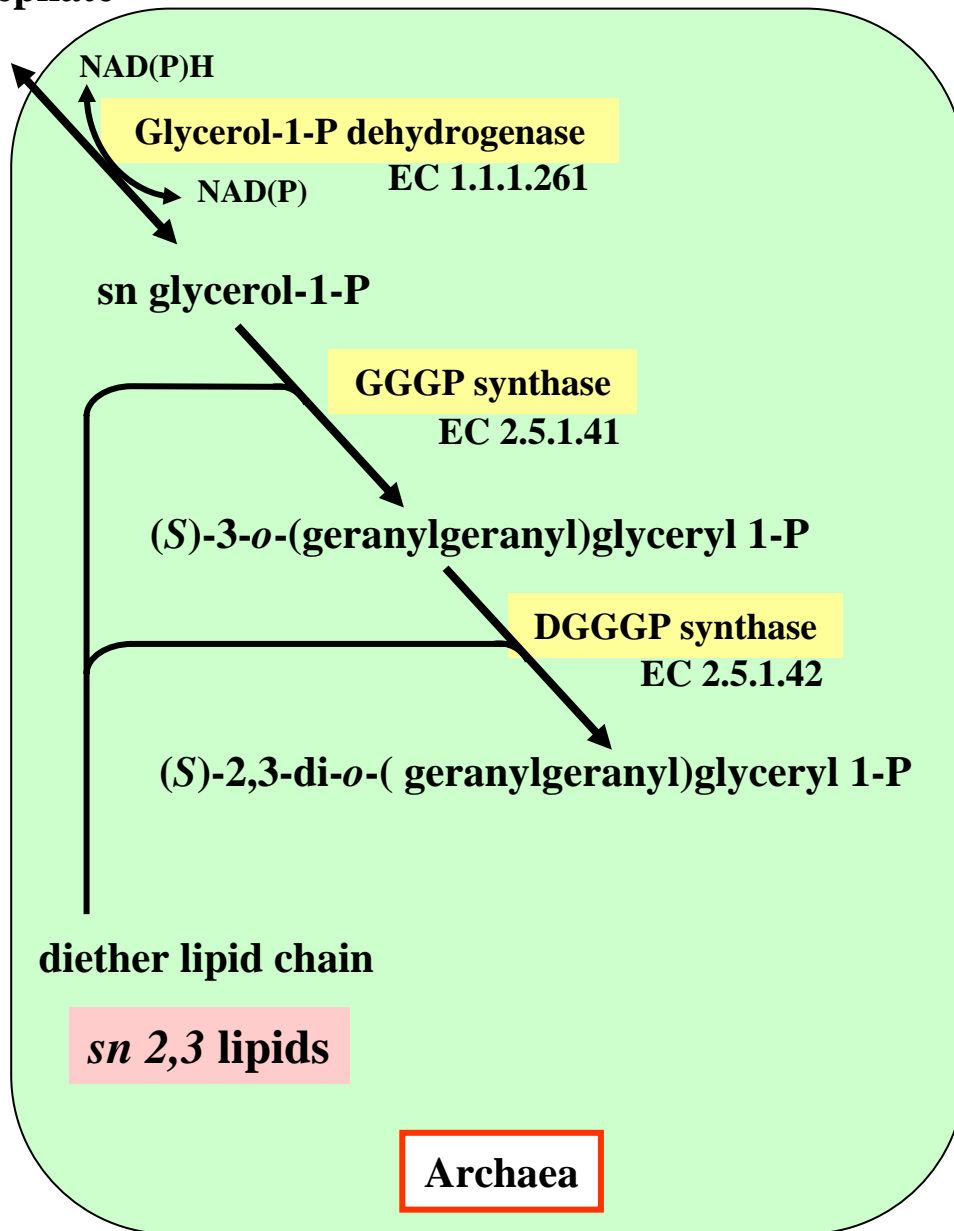

Supplement: 13062_2008_107_MOESM1_ESM.pdf [file 13062_2008_107_MOESM1_ESM.pdf]

**B**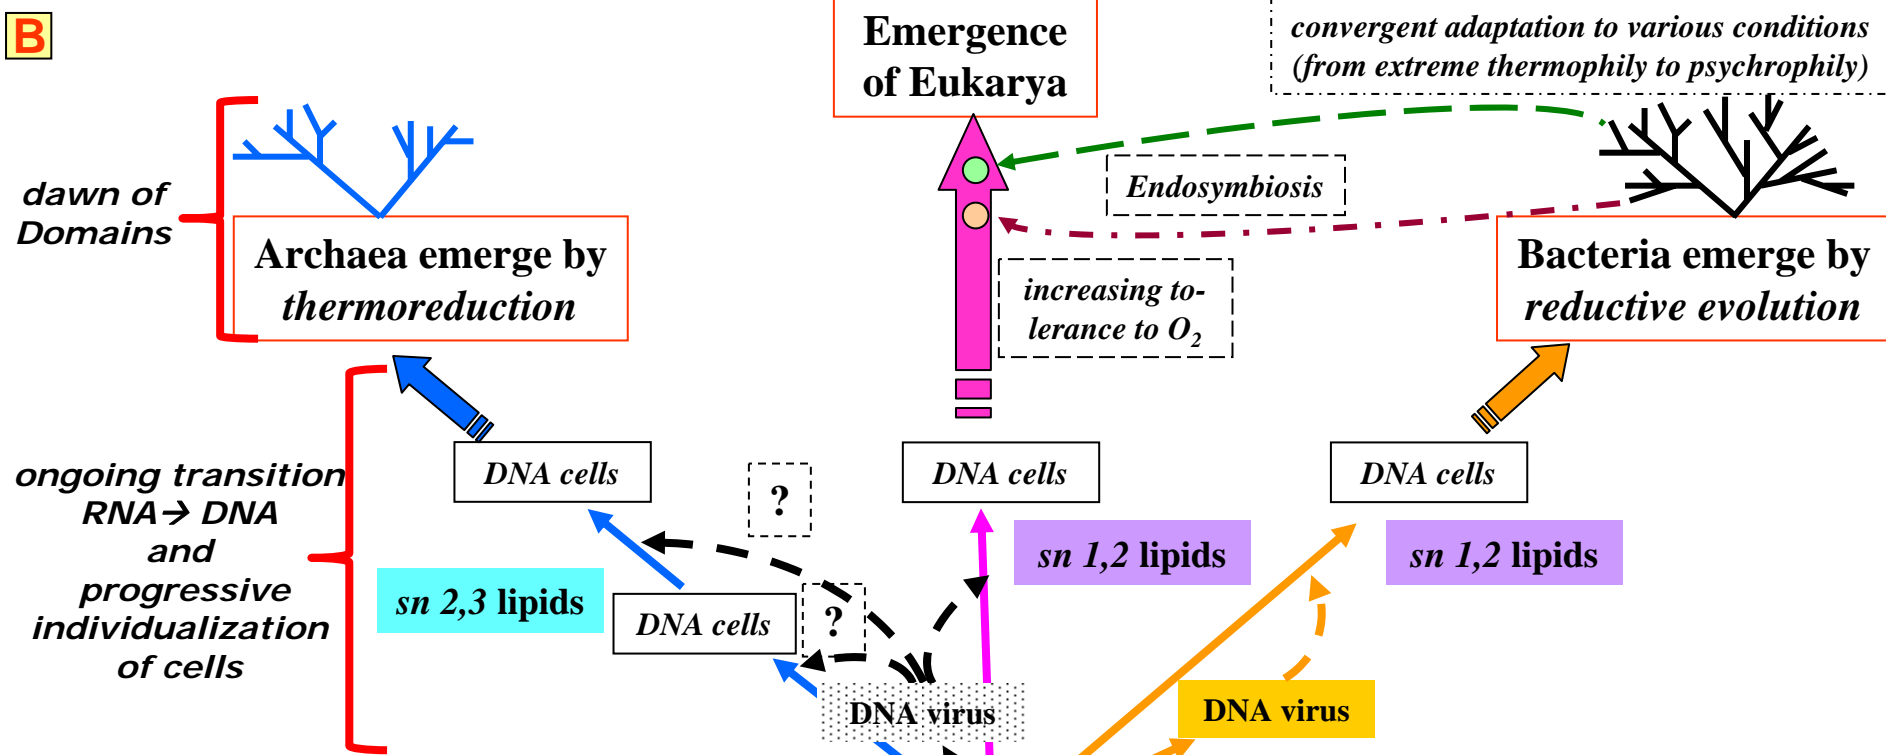**A**

Adapting Juan Miro's "Potato"

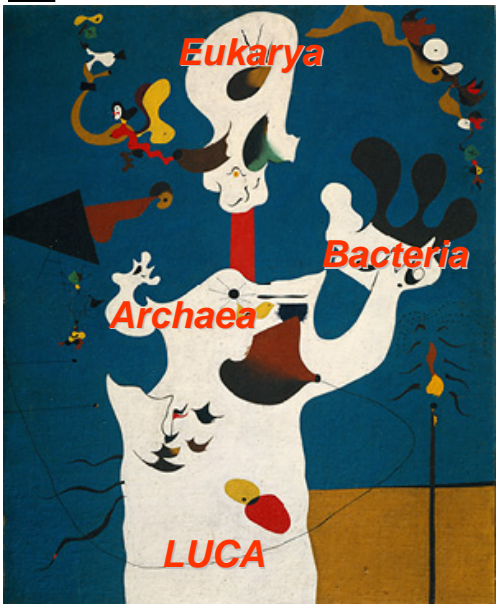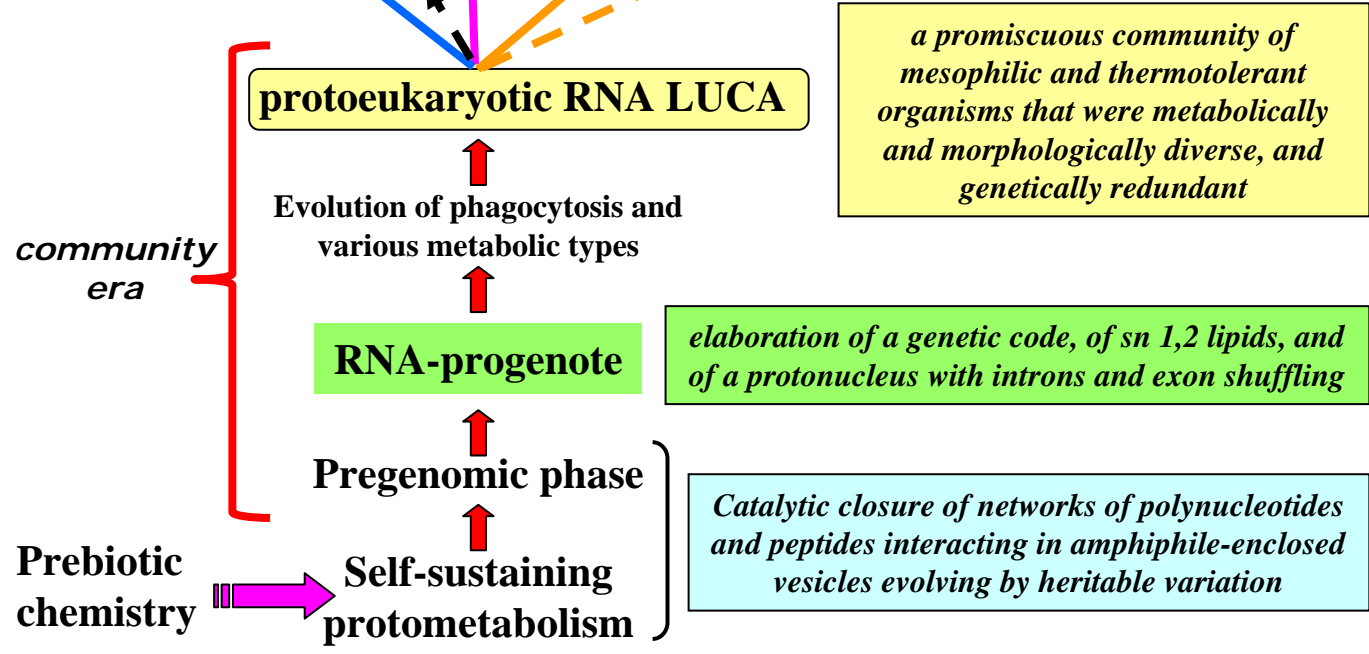

Supplement: 13062_2008_107_MOESM2_ESM.pdf [file 13062_2008_107_MOESM2_ESM.pdf]
